# Supplementary material for: Synergistic Interaction of Glycyrrhizin with Norfloxacin Displays ROS-Induced Bactericidal Activity against Multidrug-Resistant Staphylococcus aureus
Source: MDPI journal article supplement (doi:10.3390/ddc2020016), 2023-04-26
Supplement: s1 [file s1]

Archive with 1 entries (1 files):
- ddc-2294552-supplementary.pdf
